# Supplementary material for: Citrate-gel preparation and ammonia synthesis activity of compounds in the quaternary (Ni,M)2Mo3N (M = Cu or Fe) systems
Source: Royal Society of Chemistry journal article supplement (doi:10.1039/c9dt03673c), 2019-01-01
Supplement: c9dt03673c1.pdf [file c9dt03673c1.pdf]

## Supplementary information: Citrate-gel preparation and ammonia synthesis activity of compounds in the quaternary $(\text{Ni},\text{M})_2\text{Mo}_3\text{N}$ ( $\text{M} = \text{Cu}$ or $\text{Fe}$ ) systems

Samia Al Sobhi,<sup>a</sup> Justin S. J. Hargreaves,<sup>b,\*</sup> Andrew L. Hector<sup>a,\*</sup> and Said Laassiri<sup>b</sup>

<sup>a</sup> School of Chemistry, University of Southampton, Highfield, Southampton SO17 1BJ, United Kingdom

<sup>b</sup> WestCHEM, School of Chemistry, University of Glasgow, Joseph Black Building, Glasgow G12 8QQ, United Kingdom

**Table S1** Quantities of reagents used in the synthesis of nickel copper molybdenum nitride  $(\text{Ni},\text{M})_2\text{Mo}_3\text{N}$  ( $\text{M} = \text{Cu}$  or  $\text{Ni}$ ).

| x in $\text{Ni}_{2-x}\text{Cu}_x\text{Mo}_3\text{N}$ | $\text{Ni}(\text{NO}_3)_2 \cdot 6\text{H}_2\text{O}$ | $\text{Cu}(\text{NO}_3)_2 \cdot 3\text{H}_2\text{O}$ | $(\text{NH}_4)_6\text{Mo}_7\text{O}_{24} \cdot 4\text{H}_2\text{O}$ | Citric acid monohydrate |
|------------------------------------------------------|------------------------------------------------------|------------------------------------------------------|---------------------------------------------------------------------|-------------------------|
| 0.1                                                  | 2.09 g / 7.19 mmol                                   | 0.09 g / 0.37 mmol                                   |                                                                     |                         |
| 0.2                                                  | 1.97 g / 6.77 mmol                                   | 0.18 g / 0.75 mmol                                   |                                                                     |                         |
| 0.3                                                  | 1.86 g / 6.40 mmol                                   | 0.27 g / 1.12 mmol                                   |                                                                     |                         |
| 0.4                                                  | 1.76 g / 6.05 mmol                                   | 0.36 g / 1.49 mmol                                   |                                                                     |                         |
| 0.5                                                  | 1.65 g / 5.67 mmol                                   | 0.46 g / 1.90 mmol                                   | 2 g / 1.62 mmol                                                     | 7.94 g / 37.8 mmol      |
| 0.6                                                  | 1.54 g / 5.30 mmol                                   | 0.55 g / 2.28 mmol                                   |                                                                     |                         |
| 0.7                                                  | 1.43 g / 4.92 mmol                                   | 0.64 g / 2.65 mmol                                   |                                                                     |                         |
| 0.75                                                 | 1.37 g / 4.71 mmol                                   | 0.68 g / 2.81 mmol                                   |                                                                     |                         |
| 0.9                                                  | 1.21 g / 4.16 mmol                                   | 0.82 g / 3.39 mmol                                   |                                                                     |                         |
| 1.0                                                  | 1.10 g / 3.78 mmol                                   | 0.91 g / 3.77 mmol                                   |                                                                     |                         |
| x in $\text{Ni}_{2-x}\text{Fe}_x\text{Mo}_3\text{N}$ | $\text{Ni}(\text{NO}_3)_2 \cdot 6\text{H}_2\text{O}$ | $\text{Fe}(\text{NO}_3)_2 \cdot 6\text{H}_2\text{O}$ | $(\text{NH}_4)_6\text{Mo}_7\text{O}_{24} \cdot 4\text{H}_2\text{O}$ | Citric acid monohydrate |
| 0.1                                                  | 2.09 g / 7.19 mmol                                   | 0.15 g / 0.37 mmol                                   |                                                                     |                         |
| 0.2                                                  | 1.97 g / 6.77 mmol                                   | 0.31 g / 0.77 mmol                                   |                                                                     |                         |
| 0.3                                                  | 1.86 g / 6.40 mmol                                   | 0.46 g / 1.14 mmol                                   |                                                                     |                         |
| 0.4                                                  | 1.76 g / 6.05 mmol                                   | 0.61 g / 1.51 mmol                                   |                                                                     |                         |
| 0.5                                                  | 1.65 g / 5.67 mmol                                   | 0.76 g / 1.89 mmol                                   |                                                                     |                         |
| 0.6                                                  | 1.54 g / 5.30 mmol                                   | 0.92 g / 2.28 mmol                                   | 2 g / 1.62 mmol                                                     | 7.94 g / 37.8 mmol      |
| 0.7                                                  | 1.43 g / 4.92 mmol                                   | 1.07 g / 2.65 mmol                                   |                                                                     |                         |
| 0.8                                                  | 1.37 g / 4.71 mmol                                   | 1.22 g / 3.02 mmol                                   |                                                                     |                         |
| 0.9                                                  | 1.21 g / 4.16 mmol                                   | 1.37 g / 3.39 mmol                                   |                                                                     |                         |
| 1.0                                                  | 1.10 g / 3.78 mmol                                   | 1.53 g / 3.79 mmol                                   |                                                                     |                         |
| 1.1                                                  | 0.99 g / 3.40 mmol                                   | 1.68 g / 4.16 mmol                                   |                                                                     |                         |

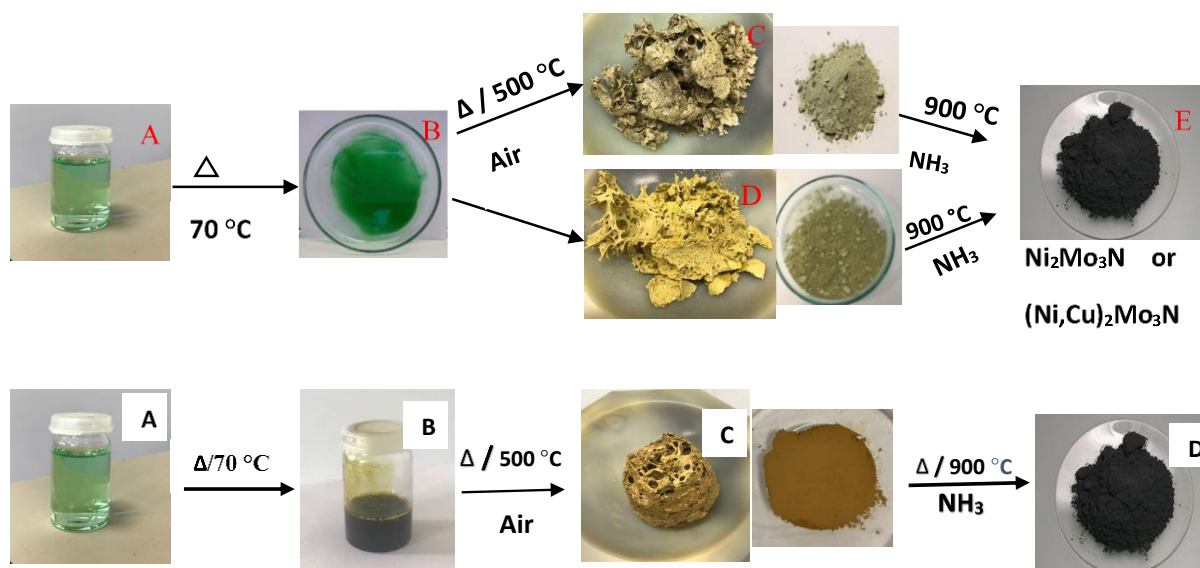

**Fig. S1** Schematic description of the citrate-gel process to produce the filled  $\beta$ -manganese type phases, with  $\text{Ni}_2\text{Mo}_3\text{N}$  and the  $(\text{Ni,Cu})_2\text{Mo}_3\text{N}$  compounds represented in the top scheme and the  $(\text{Ni,Fe})_2\text{Mo}_3\text{N}$  compounds at the bottom. From left to right: starting solution (green), gel (green or brown) after evaporating, greyish and yellowish foams after heat treatment in air at 500 °C in air, and final fine powder after heating at 900 °C in flowing  $\text{NH}_3$ .

**Note S1** Ammonia production rate calculations

The ammonia produced during catalysis was bubbled through a dilute  $\text{H}_2\text{SO}_4$  solutions, whose conductivity is known to vary linearly with the acid concentration.

$$\text{Moles of } \text{H}_2\text{SO}_4 = \text{Concentration } (\text{H}_2\text{SO}_4) \times \text{Volume } (\text{H}_2\text{SO}_4) = 0.001 \text{ mol L}^{-1} \times 0.1 \text{ L} = 1 \times 10^{-4} \text{ moles}$$

0.0002 moles of ammonia are required to completely react with  $\text{H}_2\text{SO}_4$

Change in conductivity for the reaction:

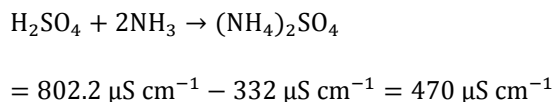

The calibration value = Number of moles of ammonia required / Total change in conductivity

$$= 2 \times 10^{-4} \text{ moles} / 470 \mu\text{S cm}^{-1}$$

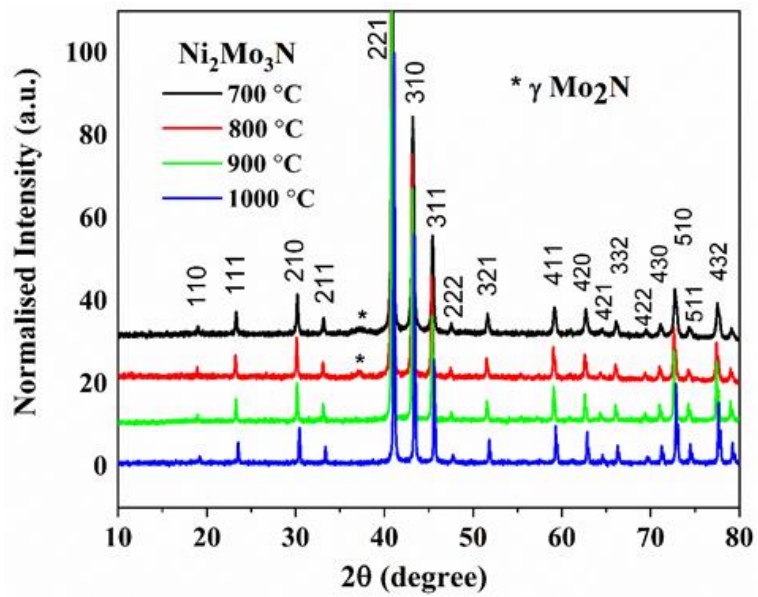

**Fig. S2** Powder XRD patterns for  $\text{Ni}_2\text{Mo}_3\text{N}$  powder prepared by firing the oxide precursors at 700 °C, 800 °C, 900 °C and 1000 °C under  $\text{NH}_3$  gas. The peaks marked with asterisks (\*) denote the  $\gamma$   $\text{Mo}_2\text{N}$  rock-salt as a secondary phase.

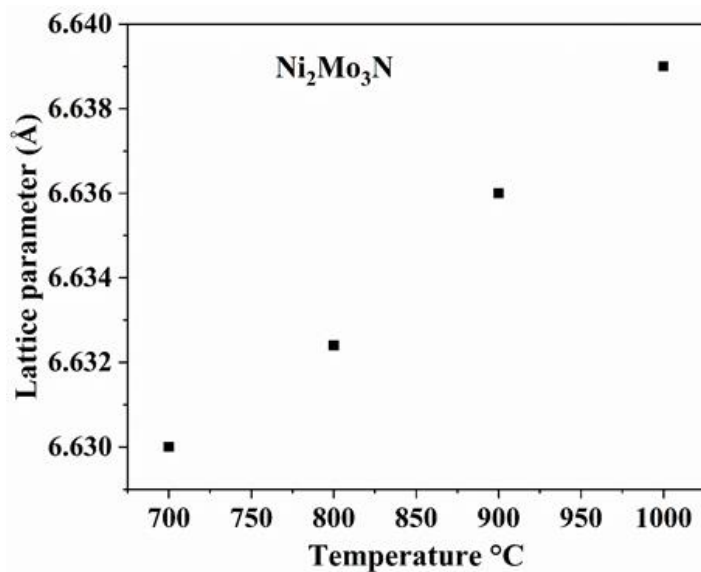

**Fig. S3** Firing temperature dependence of the lattice parameter for  $\text{Ni}_2\text{Mo}_3\text{N}$ .

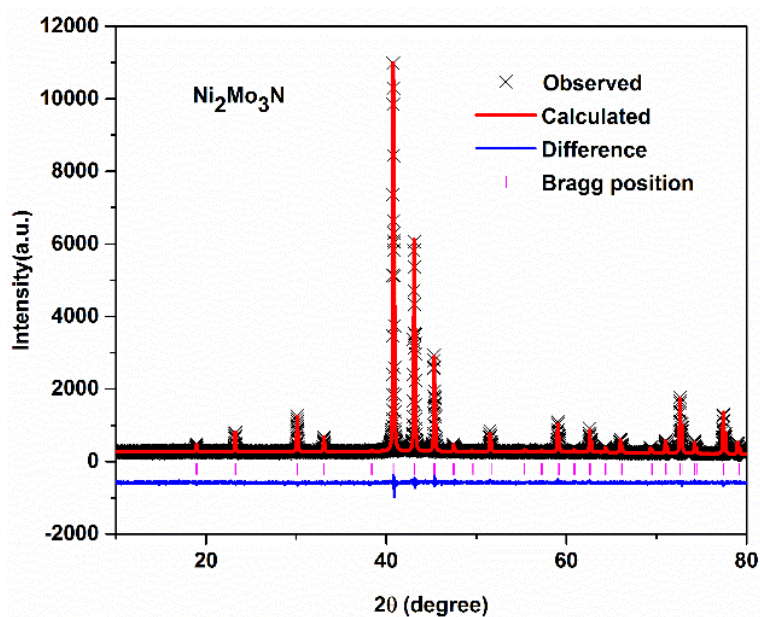

**Fig. S4** Rietveld fit to the XRD data of  $\text{Ni}_2\text{Mo}_3\text{N}$ . Black crosses mark the data points, the red continuous line the fit and the blue continuous line the difference. Pink tick marks show the positions of the allowed reflections for the filled  $\beta$ -manganese structure in  $P4_132$  ( $R_p = 6.68\%$ ,  $R_{wp} = 8.66\%$ , lattice parameter =  $6.636(1)\text{ \AA}$ ).

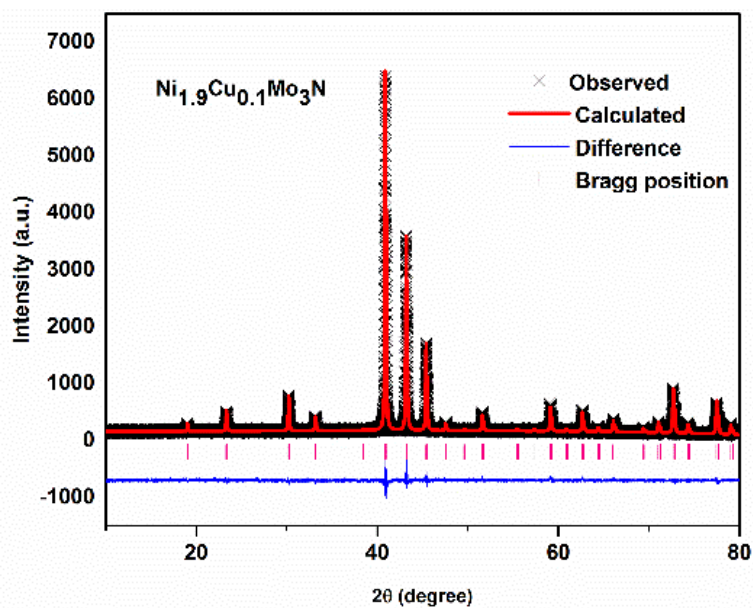

**Fig. S5** Rietveld fit to the XRD data of  $\text{Ni}_{1.9}\text{Cu}_{0.1}\text{Mo}_3\text{N}$ . Black crosses mark the data points, the red continuous line the fit and the blue continuous line the difference. Pink tick marks show the positions of the allowed reflections for the filled  $\beta$ -manganese structure in  $P4_132$  ( $R_p = 5.39\%$ ,  $R_{wp} = 7.03\%$ , lattice parameter =  $6.634036(2)\text{ \AA}$ ).

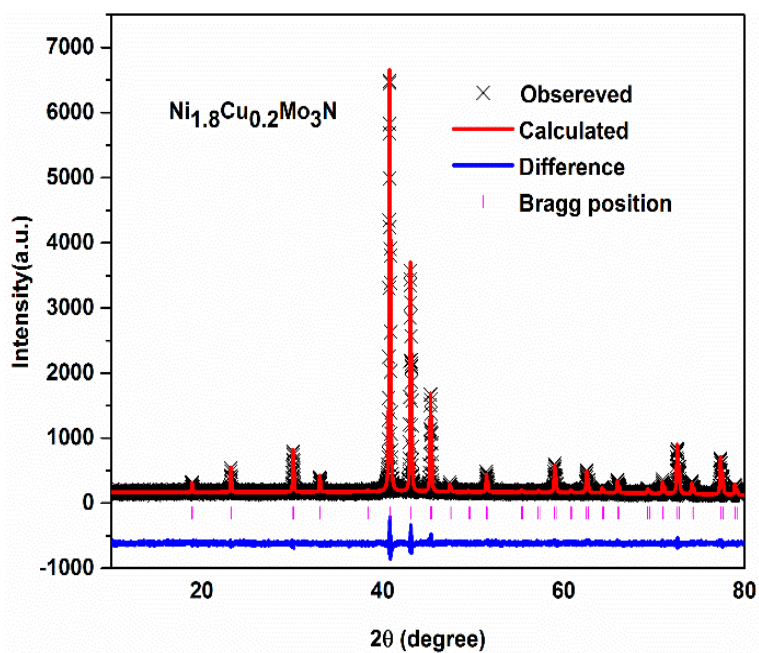

**Fig. S6** Rietveld fit to the XRD data of  $\text{Ni}_{1.8}\text{Cu}_{0.2}\text{Mo}_3\text{N}$ . Black crosses mark the data points, the red continuous line the fit and the blue continuous line the difference. Pink tick marks show the positions of the allowed reflections for the filled  $\beta$ -manganese structure in  $P4_132$ . ( $R_p = 6.38\%$ ,  $R_{wp} = 7.98\%$ , lattice parameter =  $6.643(1)\text{ \AA}$ ).

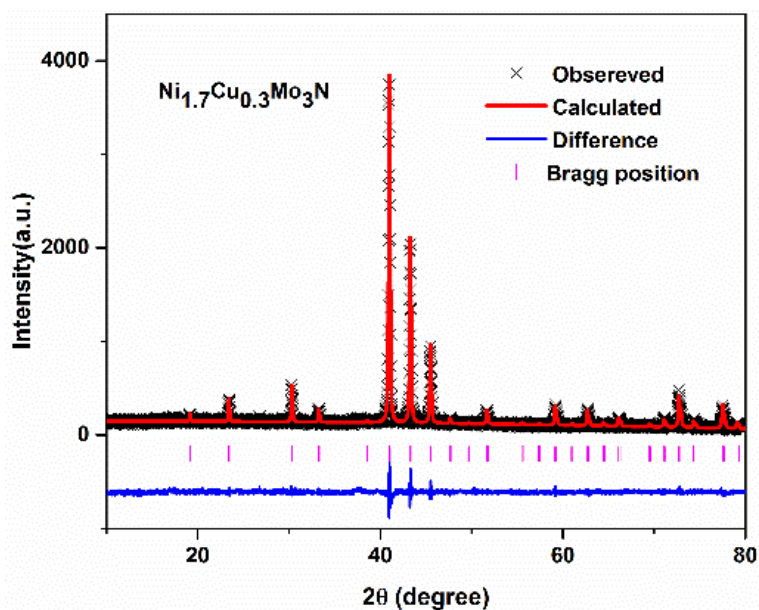

**Fig. S7** Rietveld fit to the XRD data of  $\text{Ni}_{1.7}\text{Cu}_{0.3}\text{Mo}_3\text{N}$ . Black crosses mark the data points, the red continuous line the fit and the blue continuous line the difference. Pink tick marks show the positions of the allowed reflections for the filled  $\beta$ -manganese structure in  $P4_132$ . ( $R_p = 7.57\%$ ,  $R_{wp} = 9.49\%$ , lattice parameter =  $6.645(3)\text{ \AA}$ ).

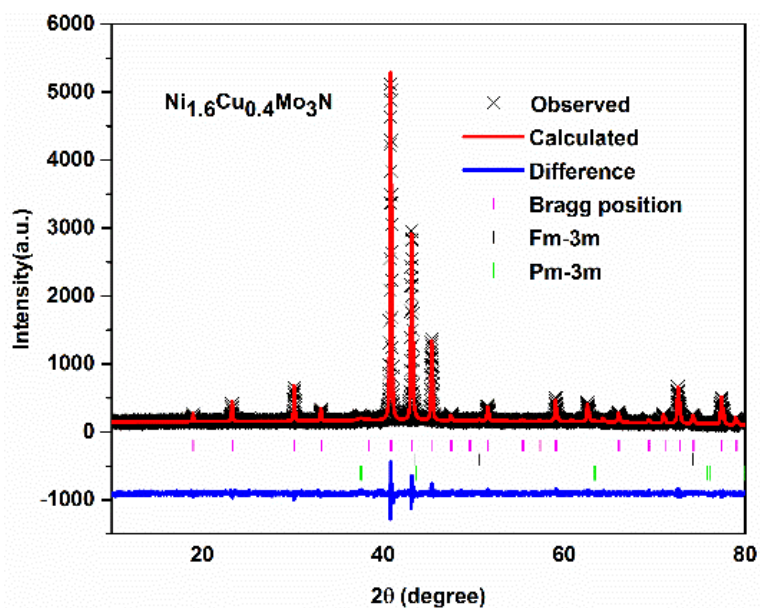

**Fig. S8** Rietveld fit to the XRD data of  $\text{Ni}_{1.6}\text{Cu}_{0.4}\text{Mo}_3\text{N}$ . Black crosses mark the data points, the red continuous line the fit and the blue continuous line the difference. Pink tick marks show the positions of the allowed reflections for the filled  $\beta$ -manganese structure in  $P4_132$ . ( $R_p = 6.12\%$ ,  $R_{wp} = 7.77\%$ , wt fraction= 96(2) %, lattice parameter= 6.6447(2) Å, crystallite size= 147(5) nm. Black tick marks represent allowed reflection positions for Cu metal (Fm-3m, wt fraction = 1.3 %, lattice parameter= 3.6(1) Å, (green) tick marks represent allowed reflection positions for  $\gamma$ - $\text{Mo}_2\text{N}$  (space group: Pm-3m, wt fraction= 2.6 %, lattice parameter = 4.17(3) Å.

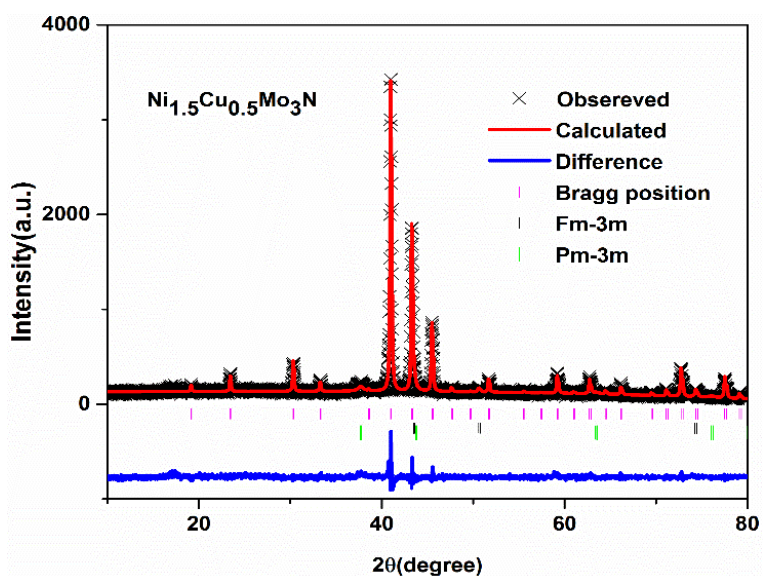

**Fig. S9** Rietveld fit to the XRD data of  $\text{Ni}_{1.5}\text{Cu}_{0.5}\text{Mo}_3\text{N}$ . Black crosses mark the data points, the red continuous line the fit and the blue continuous line the difference. Pink tick marks show the positions of the allowed reflections for the filled  $\beta$ -manganese structure in  $P4_132$ . ( $R_p = 7.95\%$ ,  $R_{wp} = 10.28\%$ , wt fraction= 94.3(3) %, lattice parameter= 6.6445(8) Å, crystallite size= 139(5) nm. Black tick marks represent allowed reflection positions for Cu metal (Fm-3m, wt fraction= 2.5 %, lattice parameter= 3.62(1) Å. Green tick marks represent allowed reflection positions for  $\gamma$ - $\text{Mo}_2\text{N}$  (Pm-3m, wt fraction = 3.2%, lattice parameter= 4.17(2) Å.

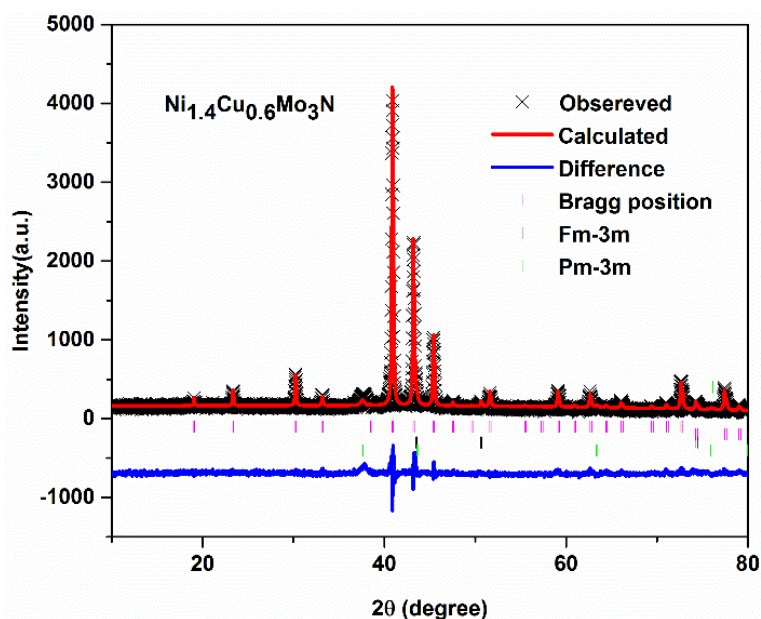

**Fig. S10** Rietveld fit to the XRD data of  $\text{Ni}_{1.4}\text{Cu}_{0.6}\text{Mo}_3\text{N}$ . Black crosses mark the data points, the red continuous line the fit and the blue continuous line the difference. Pink tick marks show the positions of the allowed reflections for the filled  $\beta$ -manganese structure in  $P4_132$ . ( $R_p = 13.25\%$ ,  $R_{wp} = 10.2\%$ , wt fraction=96(6) %, lattice parameter= 6.6442(4), crystallite size= 116(2) nm. Black tick marks represent allowed reflection positions for Cu metal (Fm-3m, wt fraction= 1.8 %, lattice parameter= 3.62(5) Å. Green tick marks represent allowed reflection positions for  $\gamma$ - $\text{Mo}_2\text{N}$  (Pm-3m, wt fraction=2.3 %, lattice parameter= 4.167(2) Å.

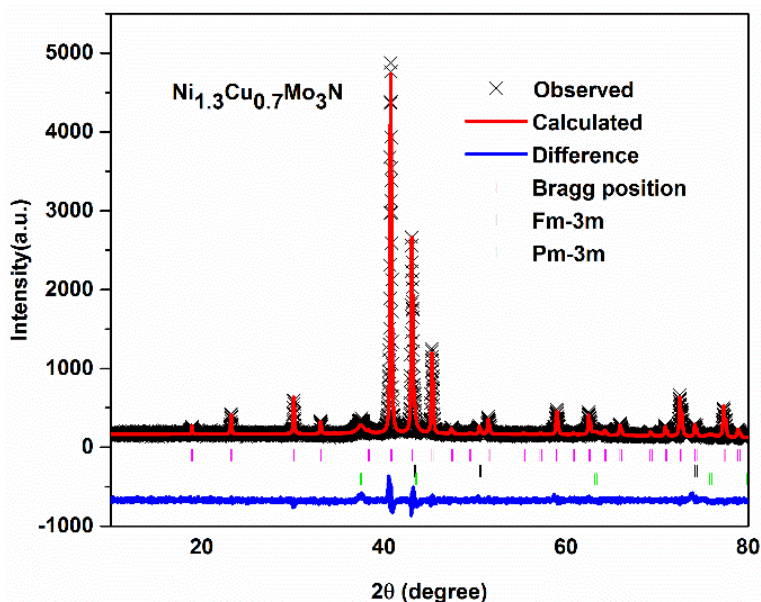

**Fig. S11** Rietveld fit to the XRD data of  $\text{Ni}_{1.3}\text{Cu}_{0.7}\text{Mo}_3\text{N}$ . Black crosses mark the data points, the red continuous line the fit and the blue continuous line the difference. Pink tick marks show the positions of the allowed reflections for the filled  $\beta$ -manganese structure in  $P4_132$  ( $R_p = 6.73\%$ ,  $R_{wp} = 8.90\%$ , wt fraction= 89.2(8) %, lattice parameter= 6.6441(2) Å, crystallite size= 120(13) nm. Black tick marks represent allowed reflection positions for Cu metal (Fm-3m, wt fraction = 3.5 %, lattice parameter= 3.62 (3) Å. Green tick marks represent allowed reflection positions for  $\gamma$ - $\text{Mo}_2\text{N}$  (Pm-3m, wt fraction= 7.3 %, lattice parameter= 4.16(1) Å.

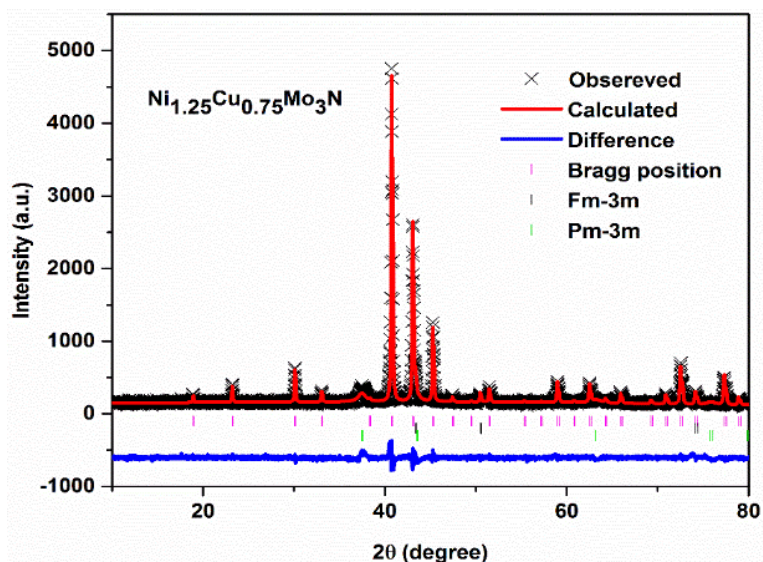

**Fig. S12** Rietveld fit to the XRD data of  $\text{Ni}_{1.25}\text{Cu}_{0.75}\text{Mo}_3\text{N}$ . Black crosses mark the data points, the red continuous line the fit and the blue continuous line the difference. Pink tick marks show the positions of the allowed reflections for the filled  $\beta$ -manganese structure in  $P4_132$  ( $R_p = 6.88\%$ ,  $R_{wp} = 9.03\%$ , wt fraction= 86(1) %, lattice parameter= 6.6441(2) Å, crystallite size= 120(15) nm). Black tick marks represent allowed reflection positions for Cu metal (Fm-3m, wt fraction= 4.4(2) %, lattice parameter= 3.616(3) Å). Green tick marks represent allowed reflection positions for  $\gamma$ - $\text{Mo}_2\text{N}$  (Pm-3m, wt fraction= 9.6(3) %, lattice parameter= 4.16(1) Å).



**Table S2** Structure information from Rietveld fits for  $\text{Ni}_{2-x}\text{Cu}_x\text{Mo}_3\text{N}$  series

| Composition                                         | a/Å       | Ni/ Cu x<br>(8c x, x, x) | Ni/ Cu                |        | Mo 12 d (1/8, y, z)   |            |             | N 4a 3/8, 3/8, 3/8 |
|-----------------------------------------------------|-----------|--------------------------|-----------------------|--------|-----------------------|------------|-------------|--------------------|
|                                                     |           |                          | Uiso / Å <sup>2</sup> | Ni/ Cu | Uiso / Å <sup>2</sup> | Y          | Z           |                    |
| $\text{Ni}_2\text{Mo}_3\text{N}$                    | 6.6364(1) | 0.0663(2)                | 0.0262(8)             |        | 0.20176(1)            | 0.45176(1) | 0.02668(5)  |                    |
| $\text{Ni}_{1.9}\text{Cu}_{0.1}\text{Mo}_3\text{N}$ | 6.6399(6) | 0.06644(1)               | 0.03452(1)            |        | 0.2018(1)             | 0.4518(1)  | 0.03345(4)  | 0.2500             |
| $\text{Ni}_{1.8}\text{Cu}_{0.2}\text{Mo}_3\text{N}$ | 6.643(1)  | 0.06692(4)               | 0.04099(2)            |        | 0.20195(2)            | 0.45195(2) | 0.0425(3)   |                    |
| $\text{Ni}_{1.7}\text{Cu}_{0.3}\text{Mo}_3\text{N}$ | 6.645(3)  | 0.0672(4)                | 0.04385 (2)           |        | 0.20222(2)            | 0.45222(2) | 0.04376 (1) |                    |

**Table S3** The atom % of the Cu-doped samples from (0-0.3) evaluated by EDX analysis

| Element | $\text{Ni}_2\text{Mo}_3\text{N}$ |        | $\text{Ni}_{1.9}\text{Cu}_{0.1}\text{Mo}_3\text{N}$ |        | $\text{Ni}_{1.8}\text{Cu}_{0.2}\text{Mo}_3\text{N}$ |        | $\text{Ni}_{1.7}\text{Cu}_{0.3}\text{Mo}_3\text{N}$ |        |
|---------|----------------------------------|--------|-----------------------------------------------------|--------|-----------------------------------------------------|--------|-----------------------------------------------------|--------|
|         | Calculated                       | Actual | Calculated                                          | Actual | Calculated                                          | Actual | Calculated                                          | Actual |
| Ni      | 40                               | 36.4   | 38                                                  | 36.5   | 36                                                  | 32     | 34                                                  | 27.9   |
| Cu      | 0                                | 0      | 2                                                   | 1.7    | 4                                                   | 2.8    | 6                                                   | 4      |
| Mo      | 60                               | 63     | 60                                                  | 61.2   | 60                                                  | 65     | 60                                                  | 67     |

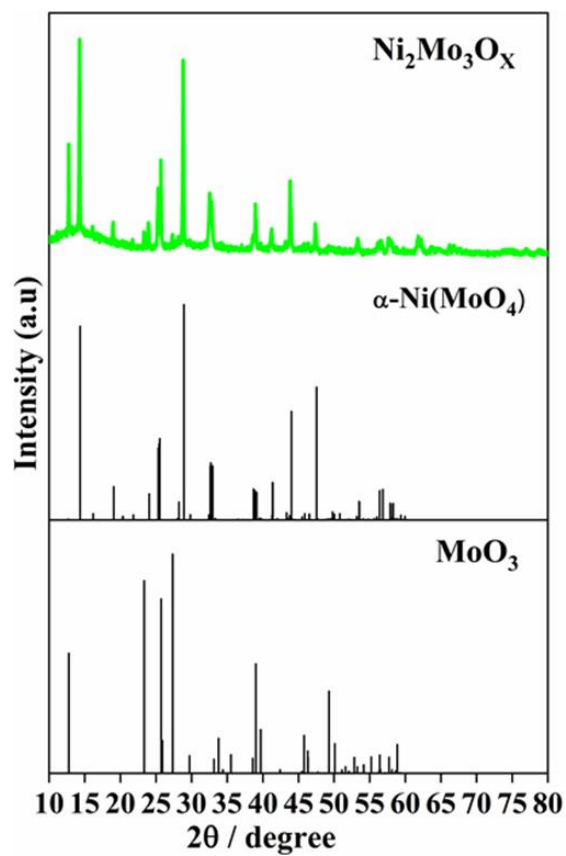

**Fig. S13** Powder XRD pattern of the products of heating  $\text{Ni}_2\text{Mo}_3\text{N}$  in the TGA to 700 °C in 50%  $\text{O}_2$ /50% Ar.

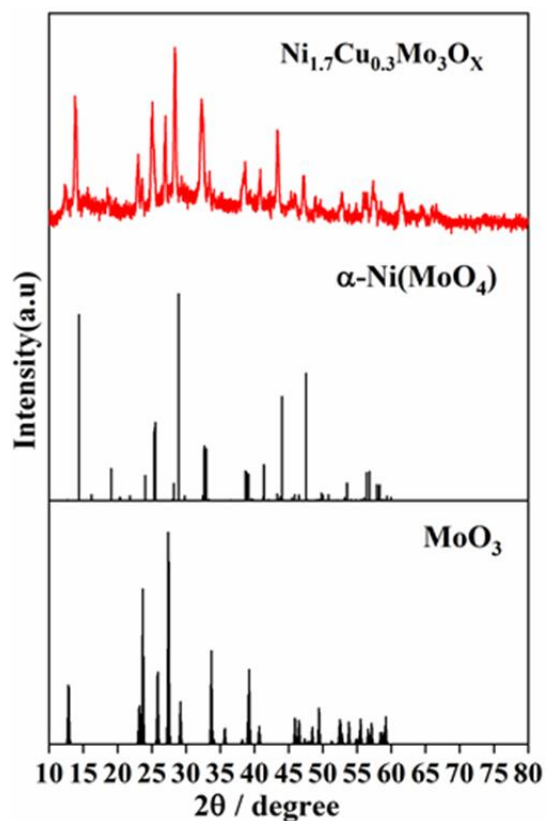

Fig. S14 Powder XRD pattern of the products of heating  $\text{Ni}_{1.7}\text{Cu}_{0.3}\text{Mo}_3\text{N}$  in the TGA to 700 °C in 50%  $\text{O}_2$ /50% Ar.

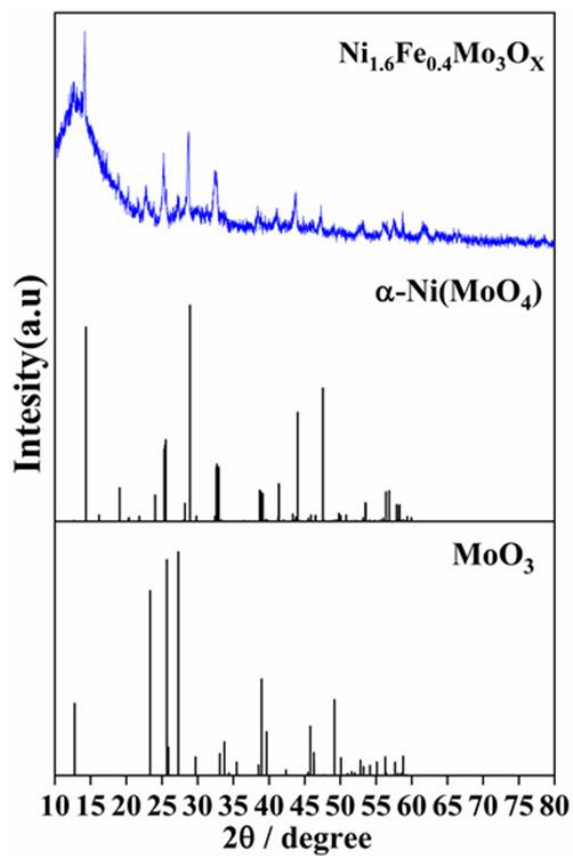

Fig. S15 Powder XRD pattern of the products of heating  $\text{Ni}_{1.6}\text{Fe}_{0.4}\text{Mo}_3\text{N}$  in the TGA to 700 °C in 50%  $\text{O}_2$ /50% Ar

**Table S4** Mass % of various oxides formed from TGA of the resulting composites

| Composition                                           | Overall Mass Gain Observed/ % | Expected Mass Gain/ % |
|-------------------------------------------------------|-------------------------------|-----------------------|
| Ni <sub>2</sub> Mo <sub>3</sub> N                     | 38.30                         | 37.95                 |
| Ni <sub>1.9</sub> Cu <sub>0.1</sub> Mo <sub>3</sub> N | 37.60                         | 38.10                 |
| Ni <sub>1.8</sub> Cu <sub>0.2</sub> Mo <sub>3</sub> N | 37.55                         | 38.26                 |
| Ni <sub>1.7</sub> Cu <sub>0.3</sub> Mo <sub>3</sub> N | 37.45                         | 38.41                 |

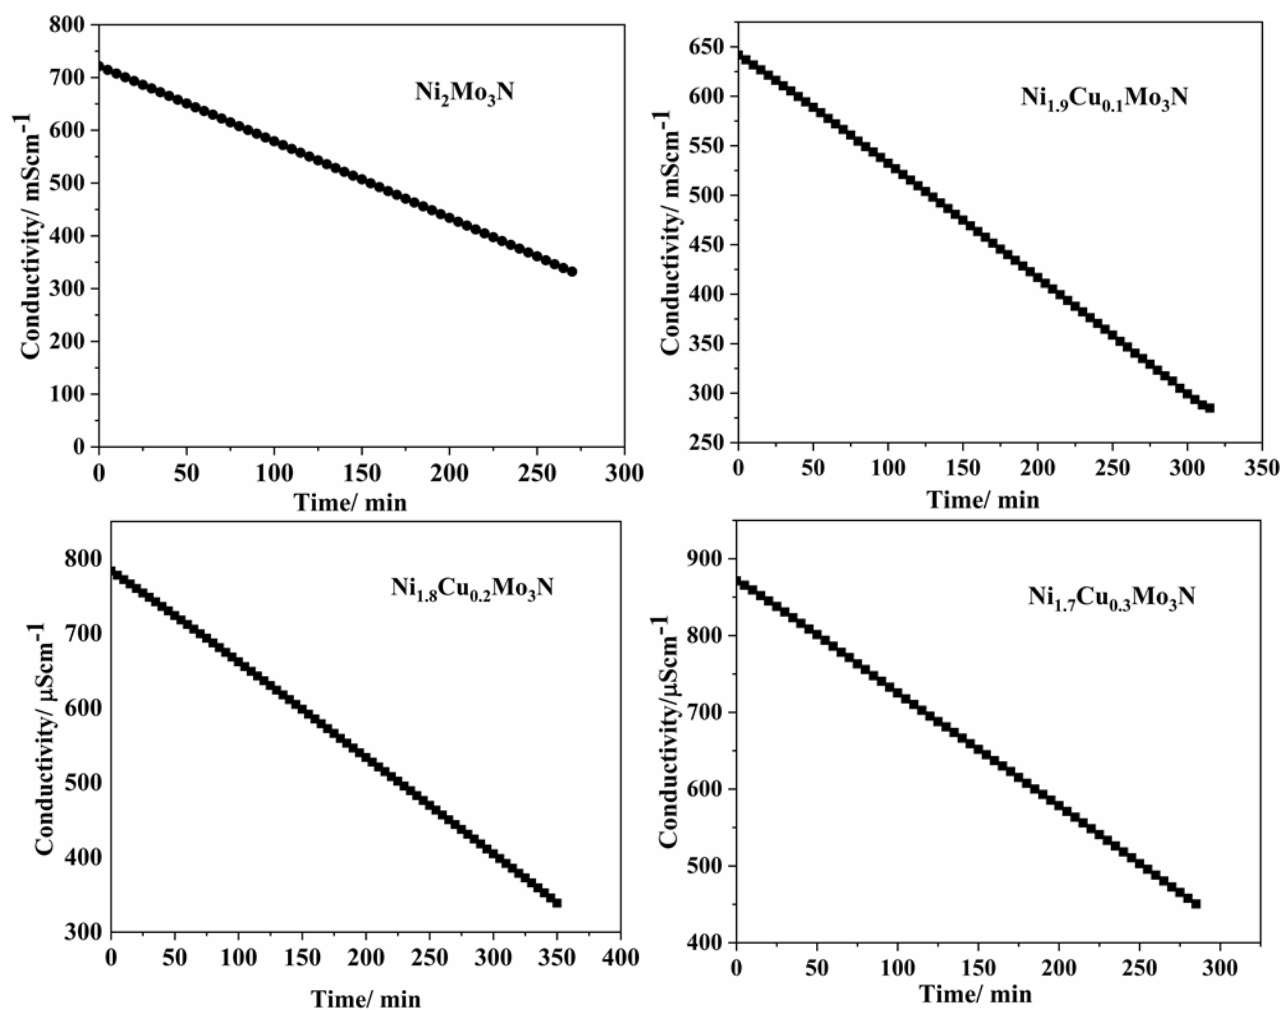

**Fig. S16** Conductivity variation of the H<sub>2</sub>SO<sub>4</sub> scrubber placed after heated (Ni,Cu)<sub>2</sub>Mo<sub>3</sub>N at 500 °C under 75 vol % H<sub>2</sub> in N<sub>2</sub> (BOC, 99.98 %).

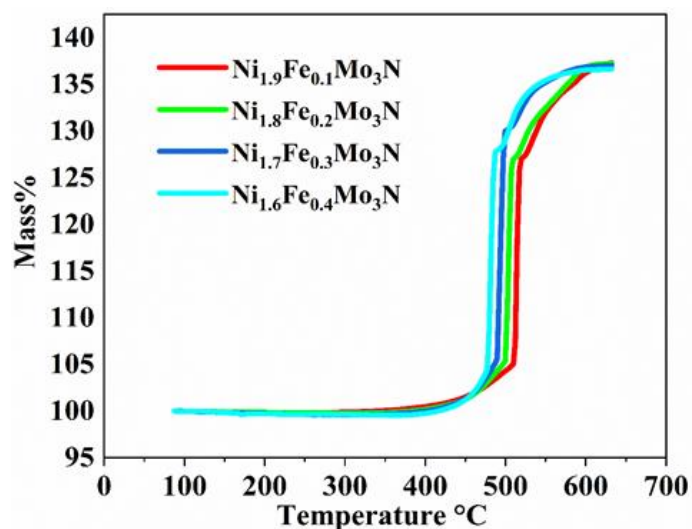

**Fig. S17** Thermogravimetric analysis curves under 50% O<sub>2</sub>/50% Ar atmosphere for the different Fe contents of (Ni,Fe)<sub>2</sub>Mo<sub>3</sub>N (0, 0.1, 0.2 and 0.5) samples with the heating rate of 10 °C /min from room temperature to 700 °C. The initial weight of every sample before measurement is 0.015 g. Mass changes compared with calculated values are given in Table S5 and EDX data are given in Table S6.

**Table S5** Mass % of various oxides formed from TGA of the resulting composites.

| Composition                                           | Overall Mass Gain Observed/% | Expected Mass Gain/ % |
|-------------------------------------------------------|------------------------------|-----------------------|
| Ni <sub>2</sub> Mo <sub>3</sub> N                     | 38.43                        | 38.63                 |
| Ni <sub>1.9</sub> Fe <sub>0.1</sub> Mo <sub>3</sub> N | 37.45                        | 38.61                 |
| Ni <sub>1.8</sub> Fe <sub>0.2</sub> Mo <sub>3</sub> N | 37.59                        | 38.68                 |
| Ni <sub>1.7</sub> Fe <sub>0.3</sub> Mo <sub>3</sub> N | 37.13                        | 38.71                 |
| Ni <sub>1.6</sub> Fe <sub>0.4</sub> Mo <sub>3</sub> N | 38.14                        | 38.74                 |

**Table S6** The atom % of the Fe-doped Ni<sub>2</sub>Mo<sub>3</sub>N 900 °C samples evaluated by EDX analysis

| Element | Ni <sub>1.9</sub> Fe <sub>0.1</sub> Mo <sub>3</sub> N |        | Ni <sub>1.7</sub> Fe <sub>0.3</sub> Mo <sub>3</sub> N |        | Ni <sub>1.5</sub> Fe <sub>0.5</sub> Mo <sub>3</sub> N |        | Ni <sub>1.2</sub> Fe <sub>0.8</sub> Mo <sub>3</sub> N |        |
|---------|-------------------------------------------------------|--------|-------------------------------------------------------|--------|-------------------------------------------------------|--------|-------------------------------------------------------|--------|
|         | Calculated                                            | Actual | Calculated                                            | Actual | Calculated                                            | Actual | Calculated                                            | Actual |
| Ni      | 38                                                    | 36     | 34                                                    | 31.6   | 30                                                    | 27.5   | 24                                                    | 20     |
| Fe      | 2                                                     | 0.8    | 6                                                     | 5      | 10                                                    | 8.6    | 16                                                    | 14     |
| Mo      | 60                                                    | 63     | 60                                                    | 64     | 60                                                    | 63     | 60                                                    | 61     |

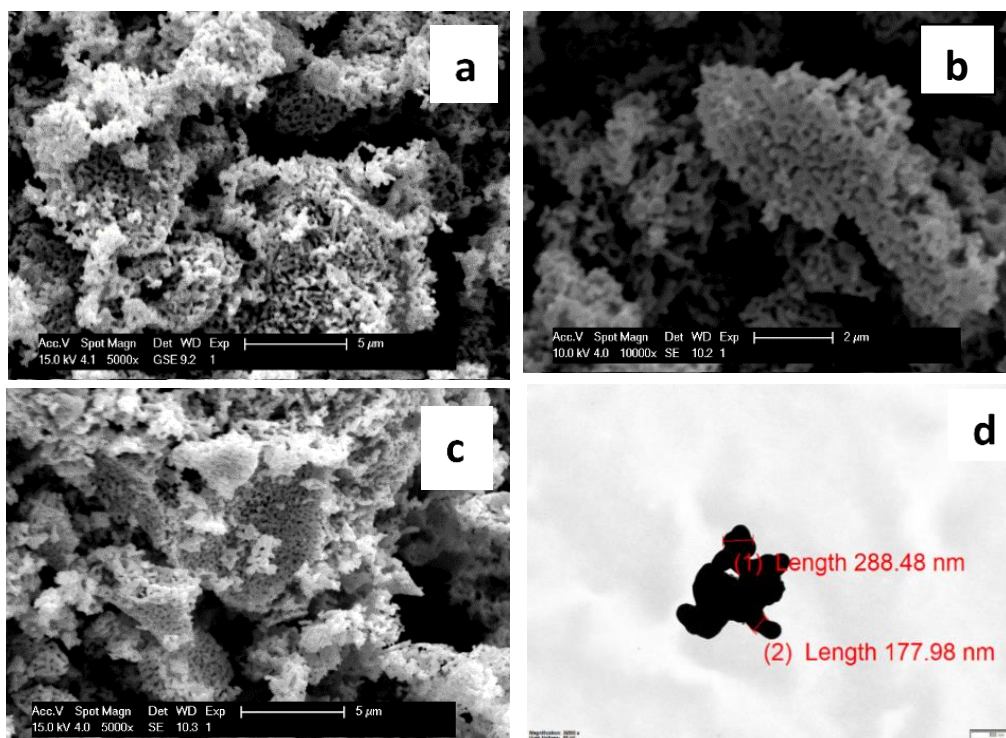

**Fig. S18** SEM images (a), (b) and (c) of  $\text{Ni}_{1.2}\text{Fe}_{0.8}\text{Mo}_3\text{N}$ ,  $\text{Ni}_{1.6}\text{Fe}_{0.4}\text{Mo}_3\text{N}$  and  $\text{Ni}_{0.8}\text{Fe}_{1.2}\text{Mo}_3\text{N}$  respectively. (d) TEM image of the fresh  $\text{Ni}_{1.7}\text{Fe}_{0.3}\text{Mo}_3\text{N}$  catalyst.

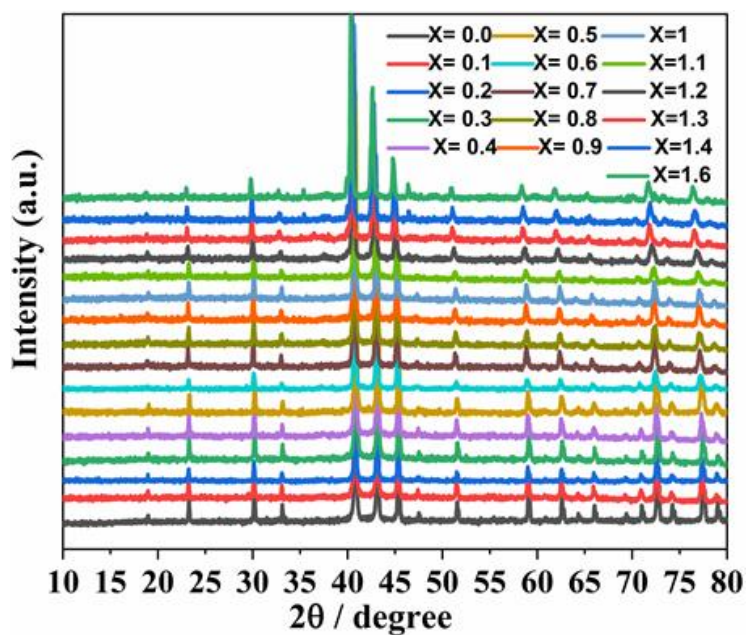

**Fig. S19** XRD patterns of  $\text{Ni}_{1-x}\text{Fe}_x\text{Mo}_3\text{N}$  samples heated under  $\text{NH}_3$  at  $900\text{ }^\circ\text{C}$  for 12 hr.

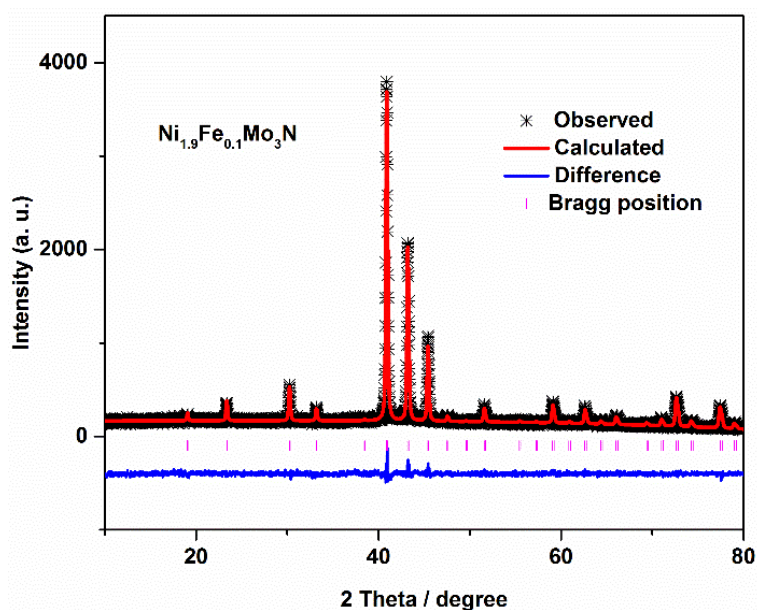

**Fig. S20** Rietveld fit to the XRD data of  $\text{Ni}_{1.9}\text{Fe}_{0.1}\text{Mo}_3\text{N}$ . Black crosses mark the data points, the red continuous line the fit and the blue continuous line the difference. Pink tick marks show the positions of the allowed reflections for the filled  $\beta$ -manganese structure in  $P4_132$  ( $R_p = 4.88\%$ ,  $R_{wp} = 6.15\%$ , lattice parameter =  $6.6369(2)\text{ \AA}$ ).

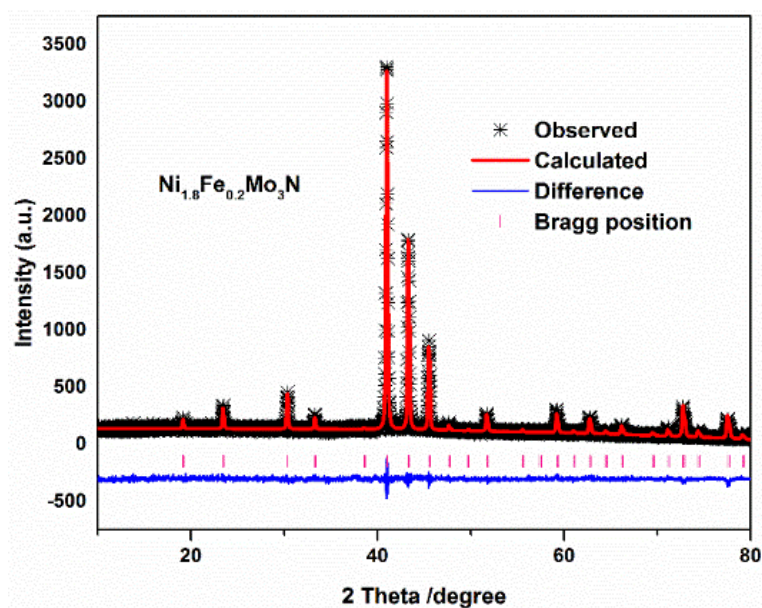

**Fig. S21** Rietveld fit to the XRD data of  $\text{Ni}_{1.8}\text{Fe}_{0.2}\text{Mo}_3\text{N}$ . Black crosses mark the data points, the red continuous line the fit and the blue continuous line the difference. Pink tick marks show the positions of the allowed reflections for the filled  $\beta$ -manganese structure in  $P4_132$  ( $R_p = 5.88\%$ ,  $R_{wp} = 7.51\%$ , lattice parameter =  $6.640192(2)\text{ \AA}$ ).

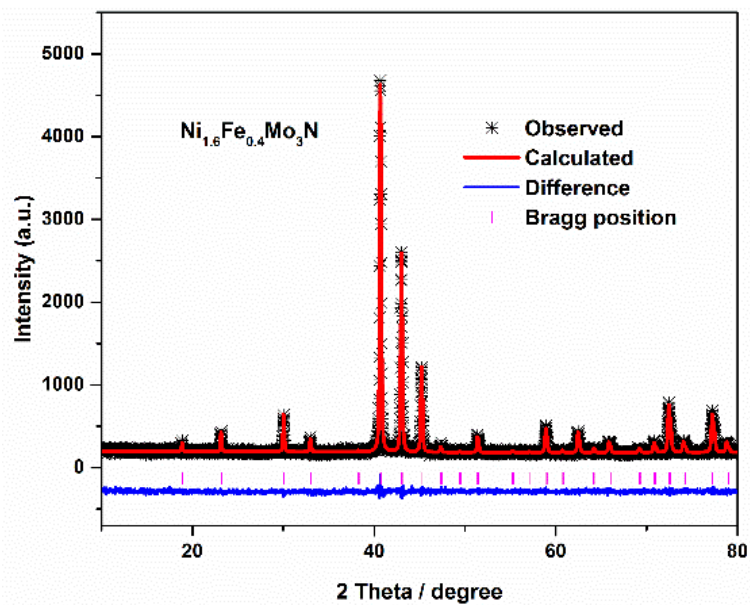

**Fig. S22** Rietveld fit to the XRD data of  $\text{Ni}_{1.6}\text{Fe}_{0.4}\text{Mo}_3\text{N}$ . Black crosses mark the data points, the red continuous line the fit and the blue continuous line the difference. Pink tick marks show the positions of the allowed reflections for the filled  $\beta$ -manganese structure in  $P4_132$  ( $R_p = 6.22\%$ ,  $R_{wp} = 7.77\%$ , lattice parameter =  $6.650198(2)\text{ \AA}$ ).

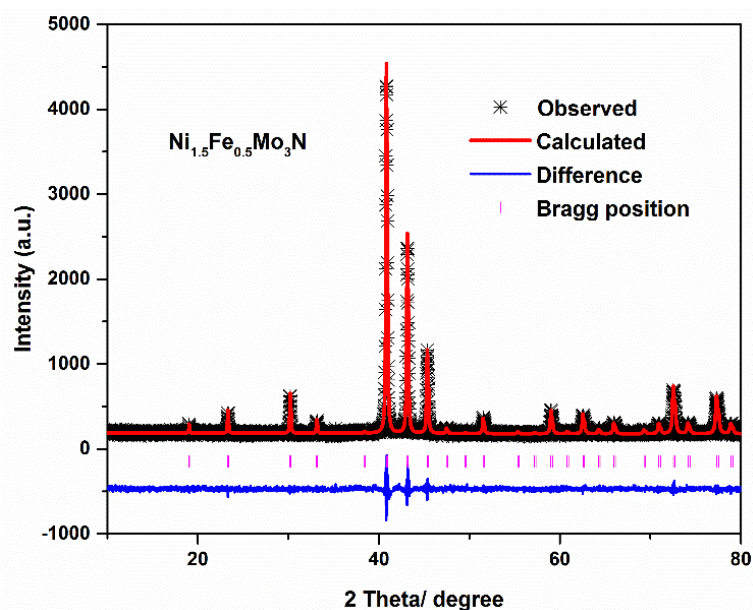

**Fig. S23** Rietveld fit to the XRD data of  $\text{Ni}_{1.5}\text{Fe}_{0.5}\text{Mo}_3\text{N}$ . Black crosses mark the data points, the red continuous line the fit and the blue continuous line the difference. Pink tick marks show the positions of the allowed reflections for the filled  $\beta$ -manganese structure in  $P4_132$  ( $R_p = 5.92\%$ ,  $R_{wp} = 7.48\%$ , lattice parameter =  $6.65553(2)\text{ \AA}$ ).



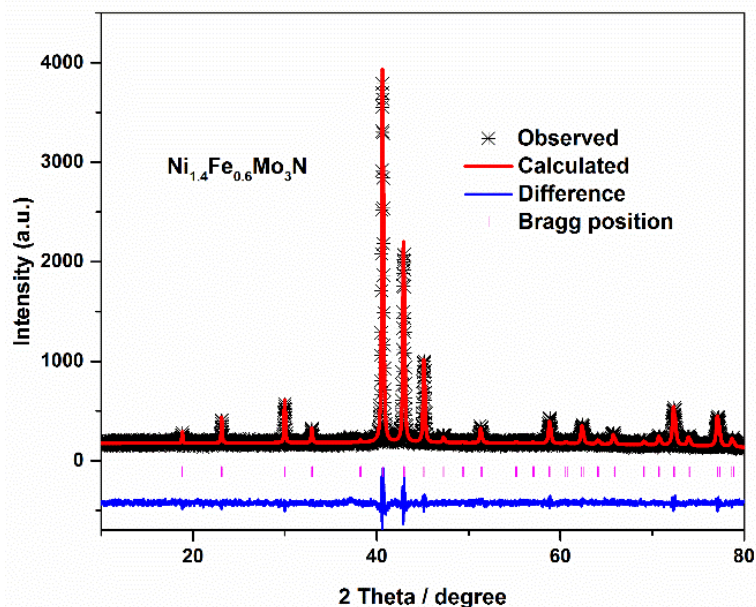

**Fig. S24** Rietveld fit to the XRD data of  $\text{Ni}_{1.4}\text{Fe}_{0.6}\text{Mo}_3\text{N}$ . Black crosses mark the data points, the red continuous line the fit and the blue continuous line the difference. Pink tick marks show the positions of the allowed reflections for the filled  $\beta$ -manganese structure in  $P4_132$  ( $R_p = 7.95\%$ ,  $R_{wp} = 10.8\%$ , lattice parameter =  $6.659(4)$  Å).

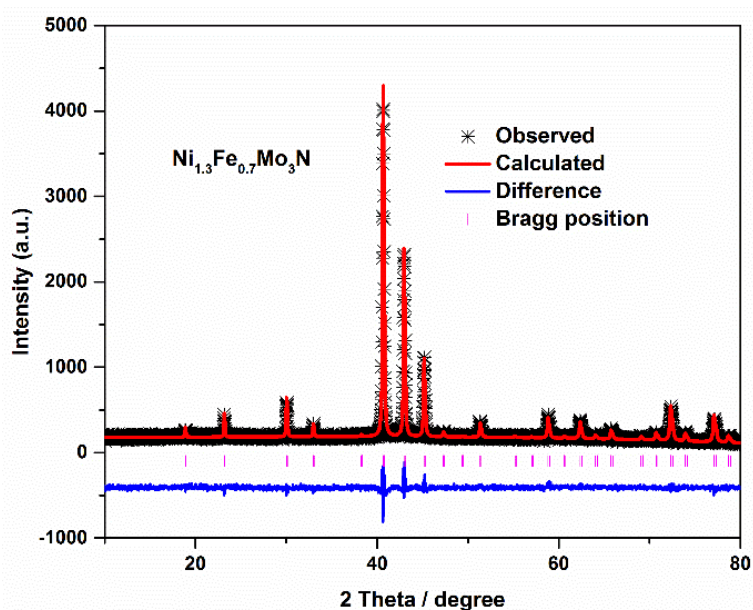

**Fig. S25** Rietveld fit to the XRD data of  $\text{Ni}_{1.3}\text{Fe}_{0.7}\text{Mo}_3\text{N}$ . Black crosses mark the data points, the red continuous line the fit and the blue continuous line the difference. Pink tick marks show the positions of the allowed reflections for the filled  $\beta$ -manganese structure in  $P4_132$  ( $R_p = 6.46\%$ ,  $R_{wp} = 8.15\%$ , lattice parameter =  $6.662(3)$  Å).

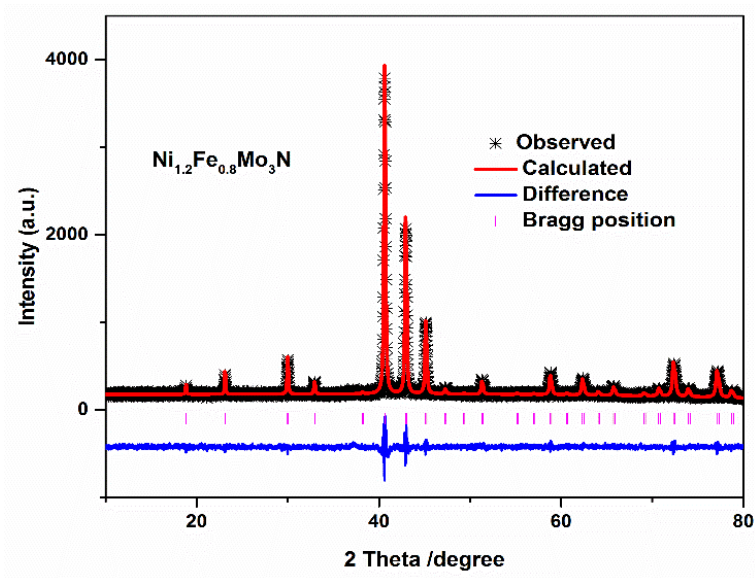

**Fig. S26** Rietveld fit to the XRD data of  $\text{Ni}_{1.2}\text{Fe}_{0.8}\text{Mo}_3\text{N}$ . Black crosses mark the data points, the red continuous line the fit and the blue continuous line the difference. Pink tick marks show the positions of the allowed reflections for the filled  $\beta$ -manganese structure in  $P4_132$  ( $R_p = 6.01\%$ ,  $R_{wp} = 7.58\%$ , lattice parameter =  $6.666(1)$  Å).

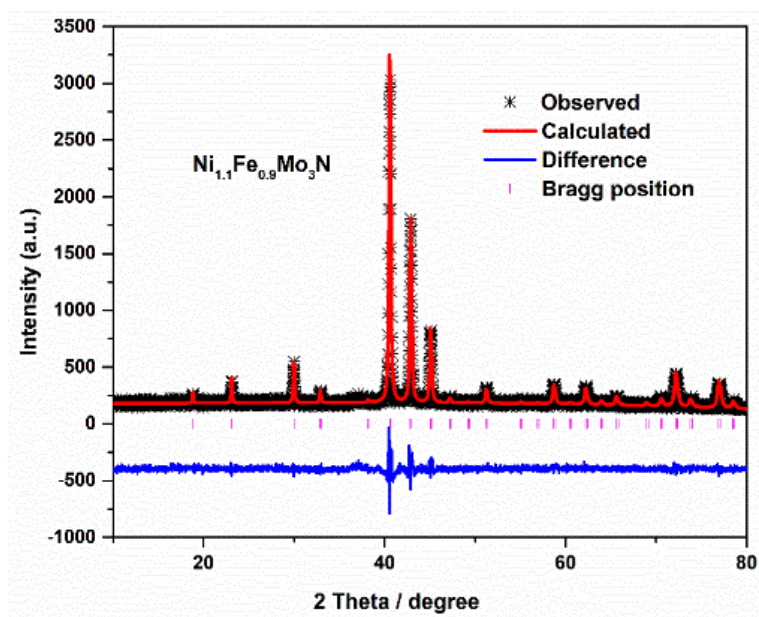

**Fig. S27** Rietveld fit to the XRD data of  $\text{Ni}_{1.1}\text{Fe}_{0.9}\text{Mo}_3\text{N}$ . Black crosses mark the data points, the red continuous line the fit and the blue continuous line the difference. Pink tick marks show the positions of the allowed reflections for the filled  $\beta$ -manganese structure in  $P4_132$  ( $R_p = 7.04\%$ ,  $R_{wp} = 8.84\%$ , lattice parameter =  $6.67298(5)$  Å).

**Table S7** Structure information from Rietveld fits for  $\text{Ni}_{2-x}\text{Fe}_x\text{Mo}_3\text{N}$  series.

| Composition                                         | a/Å         | Ni/ Fe x<br>(8c x, x, x) | Ni/ Fe<br>Uiso / Å <sup>2</sup> | Mo 12 d (1/8, y, z) |            |                       | N 4a 3/8, 3/8, 3/8 |
|-----------------------------------------------------|-------------|--------------------------|---------------------------------|---------------------|------------|-----------------------|--------------------|
|                                                     |             |                          |                                 | y                   | z          | Uiso / Å <sup>2</sup> |                    |
| $\text{Ni}_2\text{Mo}_3\text{N}$                    | 6.6364(1)   | 0.0663(2)                | 0.0262(8)                       | 0.20176(1)          | 0.45176(1) | 0.02668(5)            |                    |
| $\text{Ni}_{1.9}\text{Fe}_{0.1}\text{Mo}_3\text{N}$ | 6.63698(2)  | 0.06692(3)               | 0.026(1)                        | 0.2019(1)           | 0.4519     | 0.024                 |                    |
| $\text{Ni}_{1.8}\text{Fe}_{0.2}\text{Mo}_3\text{N}$ | 6.64193(1)  | 0.06695(4)               | 0.0154(2)                       | 0.20165(2)          | 0.45165    | 0.0127(1)             |                    |
| $\text{Ni}_{1.7}\text{Fe}_{0.3}\text{Mo}_3\text{N}$ | 6.64765(3)  | 0.0672(4)                | 0.04385 (2)                     | 0.20222(2)          | 0.45222    | 0.04376 (1)           |                    |
| $\text{Ni}_{1.6}\text{Fe}_{0.4}\text{Mo}_3\text{N}$ | 6.650198(3) | 0.067704(3)              | 0.0322(2)                       | 0.20246(2)          | 0.45246    | 0.0271(1)             |                    |
| $\text{Ni}_{1.5}\text{Fe}_{0.5}\text{Mo}_3\text{N}$ | 6.65532(2)  | 0.06778(4)               | 0.02688(1)                      | 0.2025(2)           | 0.4525     | 0.010274(1)           | 0.2500             |
| $\text{Ni}_{1.4}\text{Fe}_{0.6}\text{Mo}_3\text{N}$ | 6.65905(4)  | 0.068364(5)              | 0.01862(2)                      | 0.202472(3)         | 0.45472    | 0.01887(1)            |                    |
| $\text{Ni}_{1.3}\text{Fe}_{0.7}\text{Mo}_3\text{N}$ | 6.664 (3)   | 0.068439(6)              | 0.0304(2)                       | 0.20307(2)          | 0.45307(1) | 0.03188(1)            |                    |
| $\text{Ni}_{1.2}\text{Fe}_{0.8}\text{Mo}_3\text{N}$ | 6.66784 (5) | 0.067652(5)              | 0.048330(2)                     | 0.203614(3)         | 0.45614    | 0.04304(2)            |                    |
| $\text{Ni}_{1.1}\text{Fe}_{0.9}\text{Mo}_3\text{N}$ | 6.67298 (5) | 0.067666(5)              | 0.042884(2)                     | 0.20284 (2)         | 0.4584     | 0.042553(2)           |                    |
| $\text{NiFeMo}_3\text{N}$                           | 6.6812 (5)  | 0.054013(4)              | 0.0154(2)                       | 0.20355(2)          | 0.4555     | 0.026(1)              |                    |

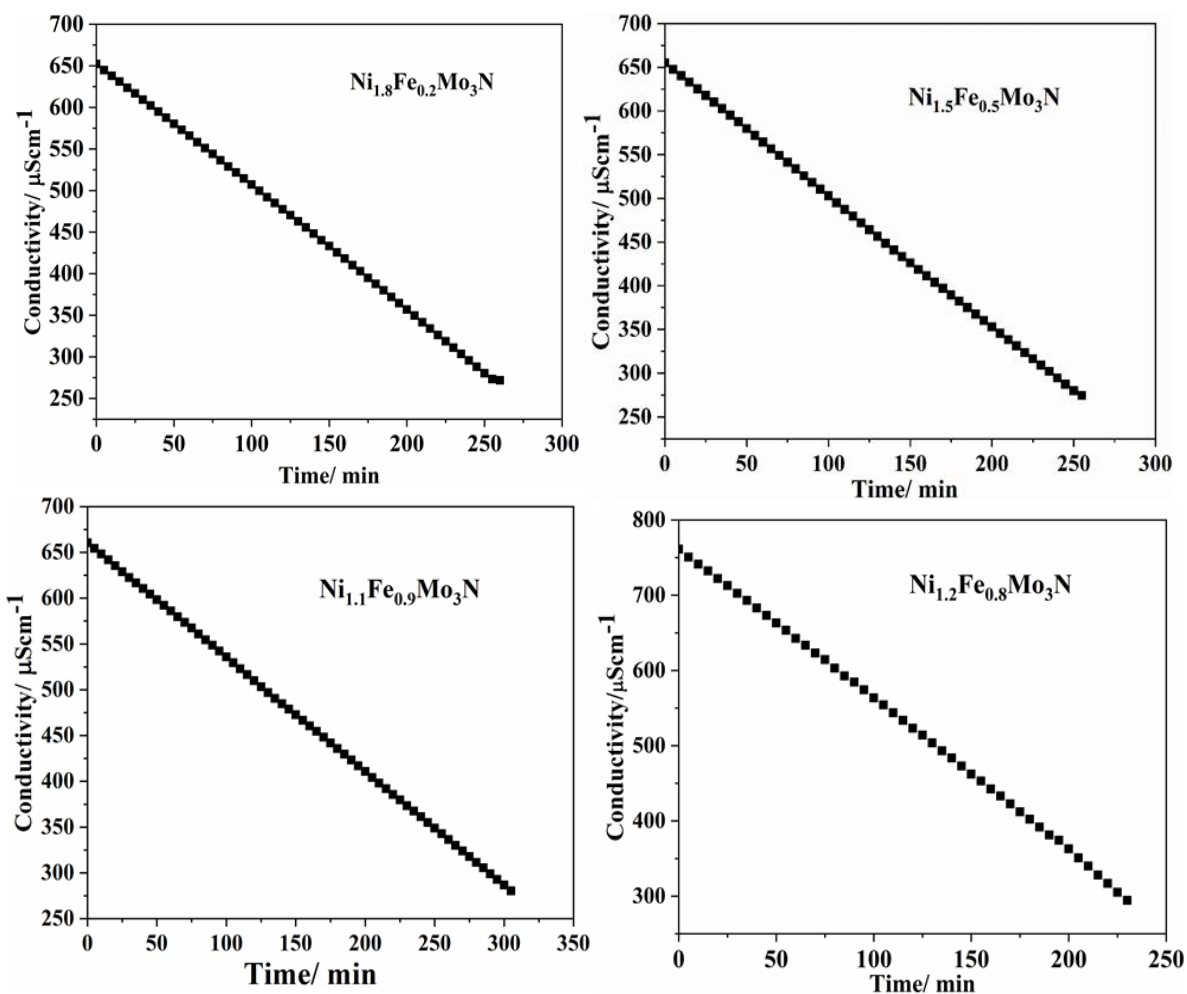

**Fig. S28** Conductivity of the  $\text{H}_2\text{SO}_4$  scrubber placed after heated  $(\text{Ni,Fe})_2\text{Mo}_3\text{N}$  at  $500^\circ\text{C}$  under 75 vol %  $\text{H}_2$  (BOC, 99.998 %) in  $\text{N}_2$  (BOC, 99.995 %).

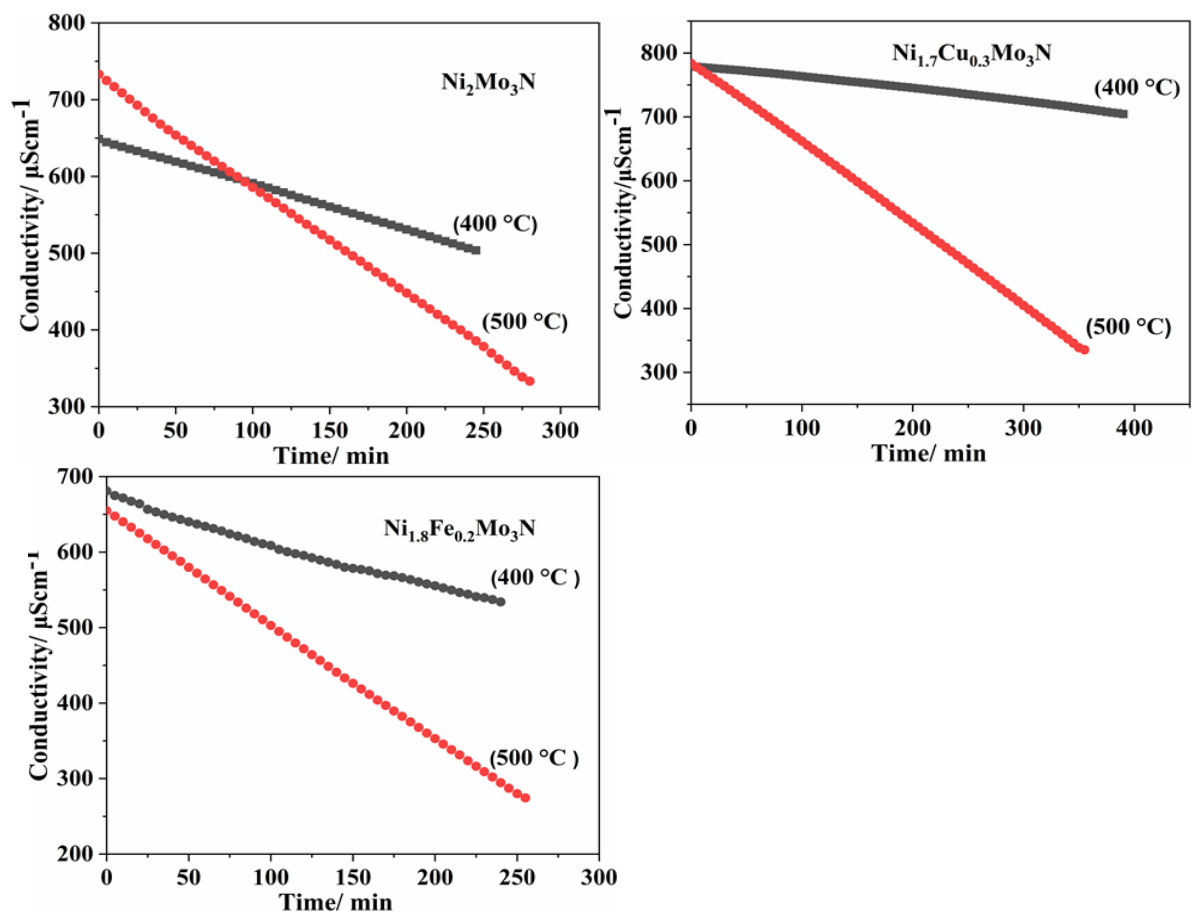

**Fig. S29** Comparison of ammonia synthesis reaction profiles for  $\text{Ni}_2\text{Mo}_3\text{N}$  (A),  $\text{Ni}_{1.7}\text{Cu}_{0.3}\text{Mo}_3\text{N}$  (B) and  $\text{Ni}_{1.8}\text{Fe}_{0.2}\text{Mo}_3\text{N}$  (C) under 75 vol %  $\text{H}_2$  in  $\text{N}_2$  (BOC, 99.98%) at 400 and 500 °C.

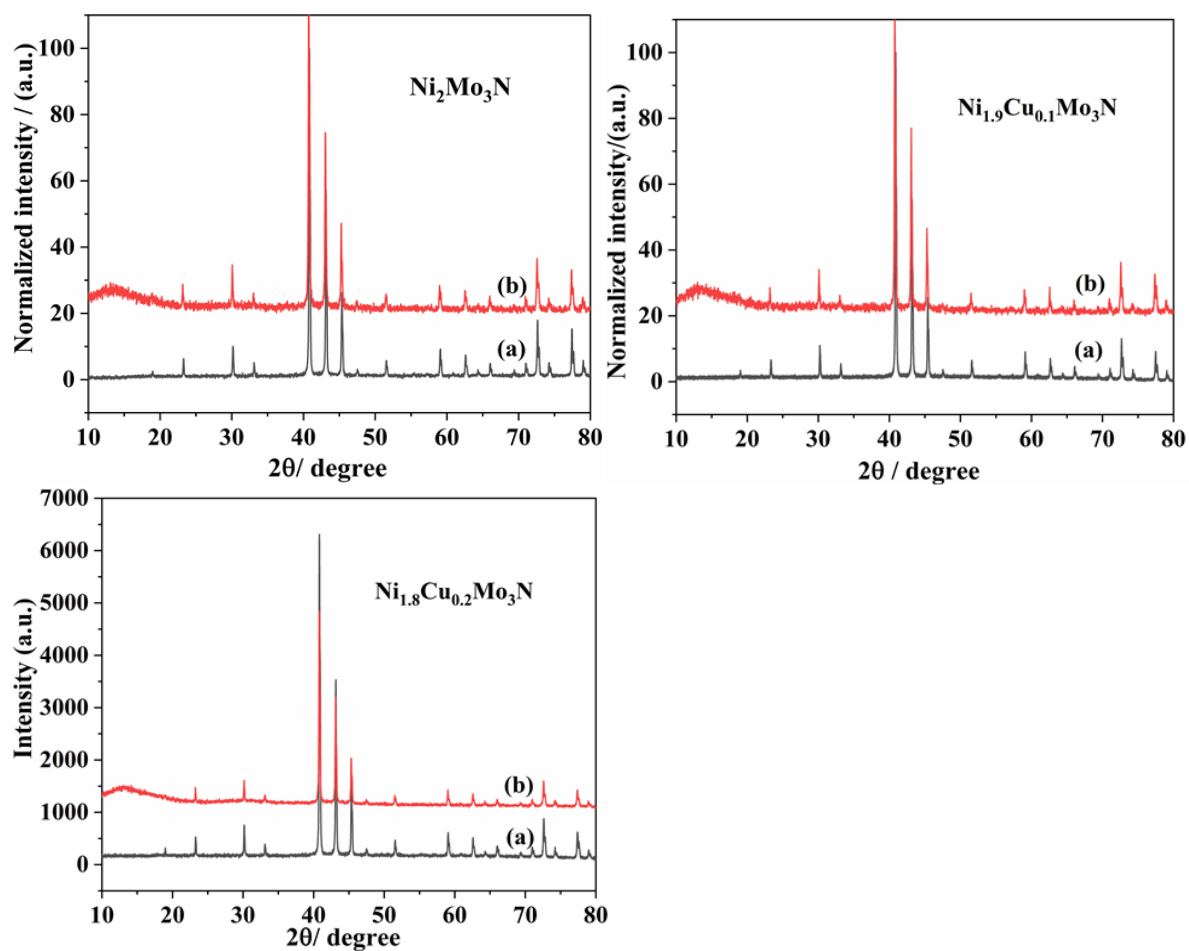

**Fig. S30** XRD patterns collected for (a) pre-reaction and (b) post-reaction of  $\text{Ni}_{1.9}\text{Cu}_{0.1}\text{Mo}_3\text{N}$  (left) and  $\text{Ni}_{1.8}\text{Cu}_{0.2}\text{Mo}_3\text{N}$  (right).

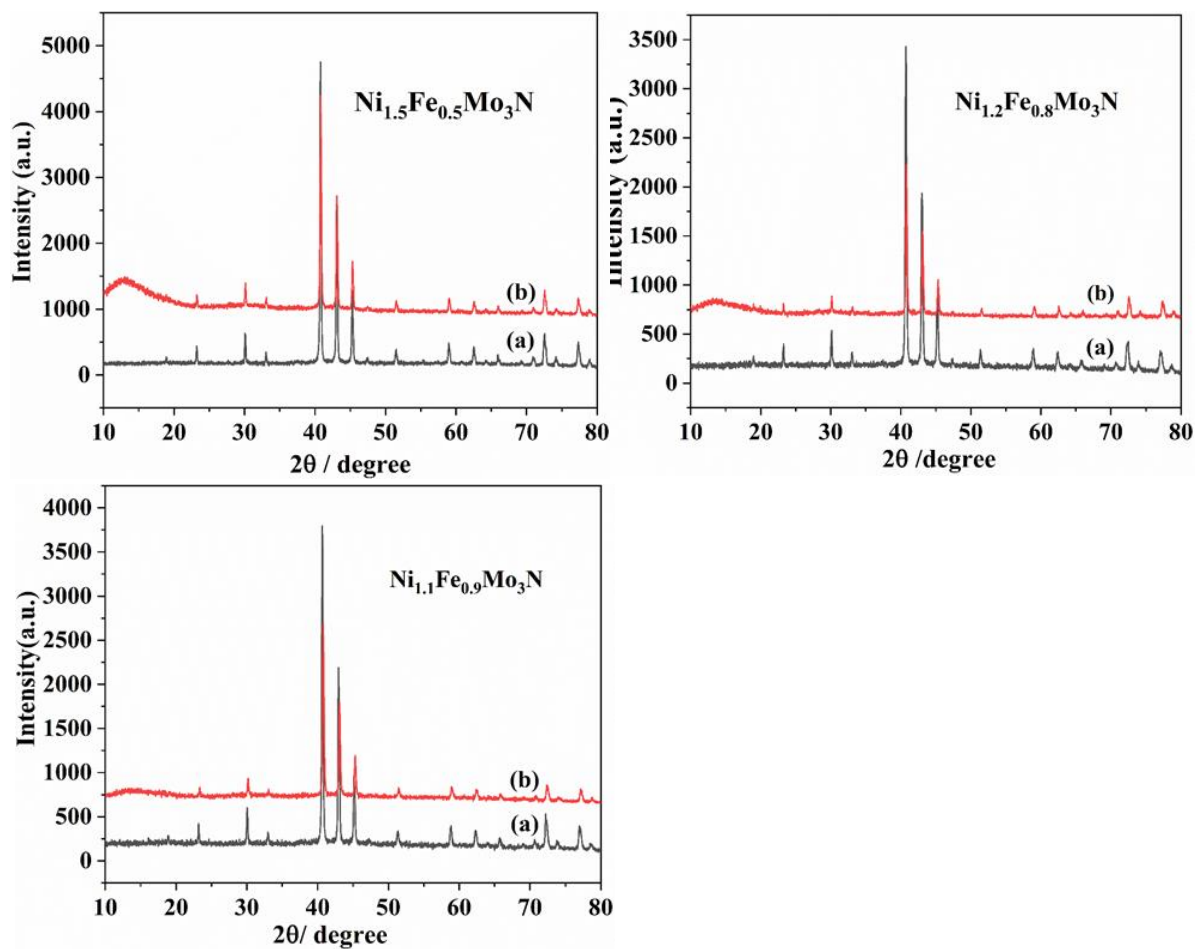

**Fig. S31** XRD patterns collected for (a) pre-reaction and (b) post-reaction of  $\text{Ni}_{1.5}\text{Fe}_{0.5}\text{Mo}_3\text{N}$ ,  $\text{Ni}_{1.2}\text{Fe}_{0.8}\text{Mo}_3\text{N}$  and  $\text{Ni}_{1.1}\text{Fe}_{0.9}\text{Mo}_3\text{N}$ .

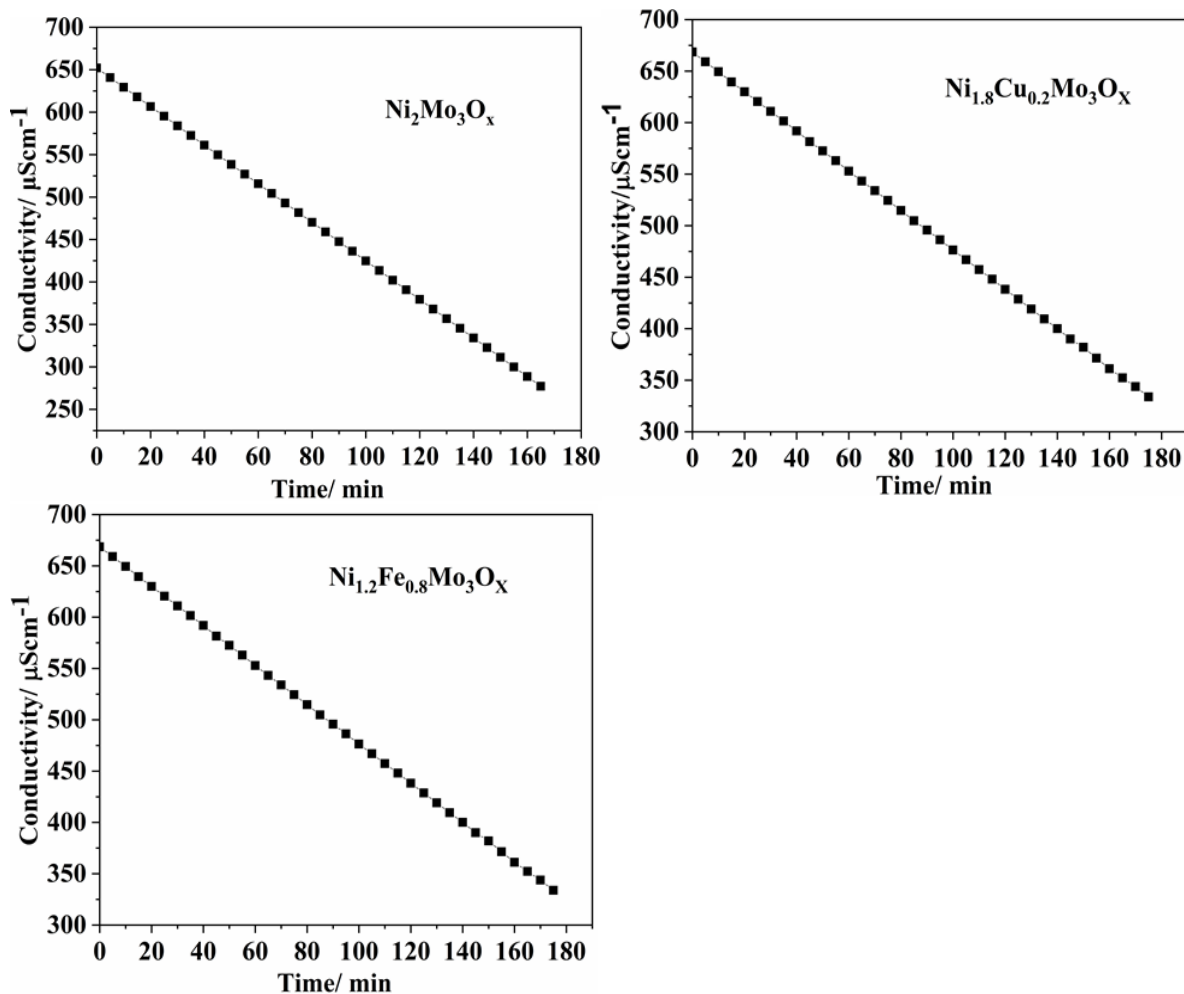

**Fig. S32** Conductivity of the  $\text{H}_2\text{SO}_4$  scrubber placed after heated  $\text{Ni}_2\text{Mo}_3\text{O}_x$ ,  $\text{Ni}_{1.7}\text{Cu}_{0.3}\text{Mo}_3\text{O}_x$  and  $\text{Ni}_{1.2}\text{Fe}_{0.8}\text{Mo}_3\text{O}_x$  at  $500^\circ\text{C}$  under 75 vol %  $\text{H}_2$  (BOC, 99.998 %) in  $\text{N}_2$  (BOC, 99.995 %). These catalyst samples were prepared during the catalyst activation step.
